# Supplementary material for: Decreased DACH1 expression in glomerulopathy is associated with disease progression and severity
Source: PubMed Central journal article supplement (PMC5349934; doi:10.18632/oncotarget.13470), 2016-11-19
Supplement: oncotarget-07-86547-s001.pdf [file oncotarget-07-86547-s001.pdf]

## Decreased DACH1 expression in glomerulopathy is associated with disease progression and severity

### Supplementary Materials

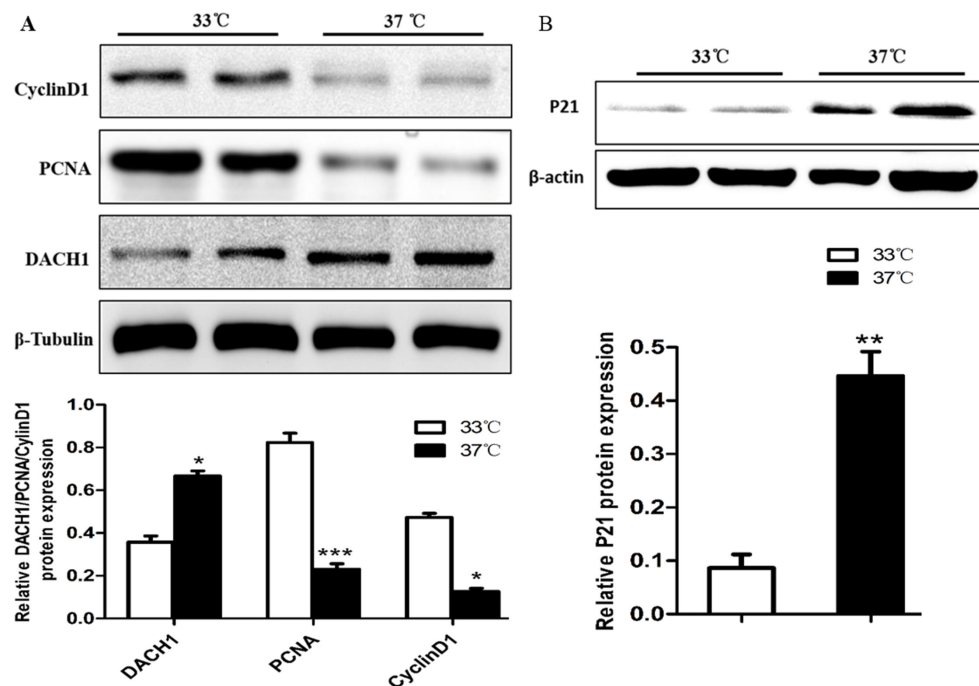

**Supplementary Figure S1: Expression of DACH1 and cell cycle-related proteins were changed during temperature-switched cell growth arrest in podocytes.** (A) Representative Western blot images and summarized data showing DACH1 was upregulated, while PCNA, CyclinD1 were downregulated during podocytes cultured by temperature-switched. (B) representative Western blot images and summarized data showing that p21 was increased during podocytes cultured by temperature-switched. \* $P < 0.05$ , \*\* $P < 0.01$ , \*\*\* $P < 0.001$  vs. cultured in a permissive temperature (33°C). All experiment were performed at least thrice with samples from independent experiments.

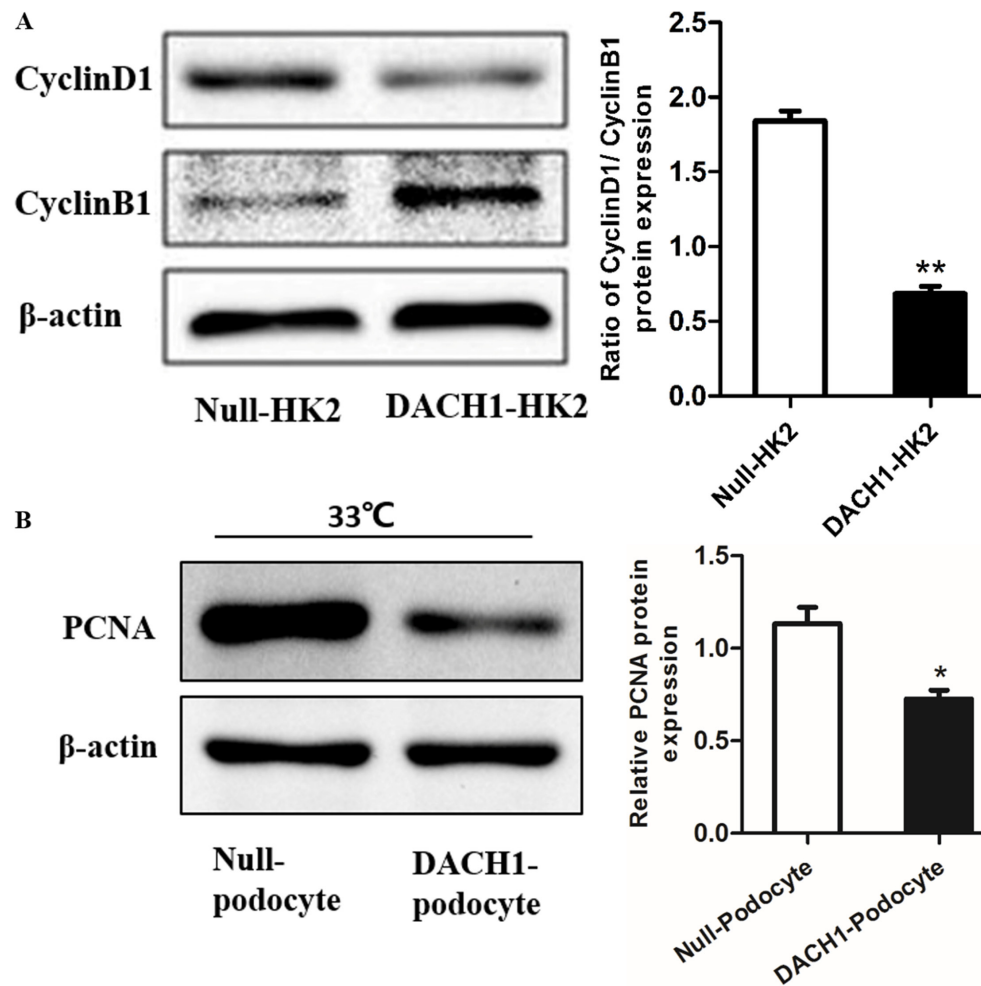

**Supplementary Figure S2: Effects of DACH1 overexpression on cell cycle-related proteins in HK2 and Podocytes.** (A) Representative Western blot images showing cyclin D1 and cyclin B1 expression and summarized data showing the ratio of cyclin D1/ cyclin B1 after Plasmid.DACH1-transfected HK2. (B) representative Western blot images and summarized data showing that the abundance PCNA was decreased in Plasmid.DACH1-transfected podocytes cultured in a permissive temperature (33°C). \* $P < 0.05$ , \*\* $P < 0.01$  vs. Null-HK2 or Null-podocyte. All experiment were performed at least thrice with samples from independent experiments.
